# Supplementary material for: The effect of Japanese eel as a main ingredient on hair condition, antioxidant ability, apparent total tract digestibility and body weight gain in cat food
Source: Front Vet Sci. 2025 Jun 16;12:1553320. doi: 10.3389/fvets.2025.1553320 (PMC12206635; doi:10.3389/fvets.2025.1553320)
Supplement: Supplementary file 2 [file Table_2.xlsx]

## Sheet: Serum antioxidant
	GSH	MDA	SOD	T-AOC
C	35.1206	0.638249	6.60347	0.720902
	21.8499	2.98387	8.24393	0.632263
	17.4263	0.504608	7.27283	0.679896
	21.4477	0.343318	7.05434	0.53648
	17.8284	0.532258	7.03006	0.478906
	26.9437	0.435484	6.62775	0.620044
	30.429	0.642857	8.90289	0.471864
	40.6166	0.900922	9.55145	0.644068
T1	61.9303	1.24885	7.10983	0.671923
	29.3566	0.59447	10.8798	0.73281
	20.7775	1.17972	9.44046	0.743165
	30.563	0.677419	11.4659	0.723284
	20.2413	0.735023	11.1468	0.663535
	25.067	0.559908	7.09249	0.77889
	140.483	0.513825	7.82775	0.573758
	113.271	0.771889	9.6104	0.672544
T2	25.7373	0.845622	9.69364	0.730636
	14.8794	0.605991	12.4925	0.716657
	21.0456	0.90553	9.95723	0.598402
	26.6756	0.608295	7.90751	0.800532
	19.437	1.19124	8.13642	0.730015
	37.5335	0.421659	6.93295	0.573447
	25.7373	0.580645	7.2104	0.681657
	86.059	0.732719	8.72254	0.658669

## Sheet: Nutrient digestibility
	calcium	Crude protein	Crude fat
C	11.29	96.29	87.96
	12.07	92.49	85.27
	15.49	96.94	89.14
	27.68	92.18	86.91
	18.57	93.54	86.2
	3.83	98.61	89.29
	0.03	94.31	86.59
	29.51	96.62	90.75
T1	49.6	92.56	87.37
	51.54	98.07	90.12
	44.74	97.65	89.56
	47.93	95.72	87.77
	51.7	96.86	90.62
	57.16	94.17	89.31
	49.92	98.09	88.3
	45.27	98.65	87.56
T2	46.55	91.89	90.48
	21.1	93.39	86.98
	48.61	97.25	90.49
	37.93	93.12	85.59
	34.31	95.53	88.71
	43.24	92.36	89.73
	40.74	95.22	89.64
	45.7	97.33	89.77

## Sheet: Hair
			hair luster			hair smoothness
	group	number	0d	28d	56d	0d	28d	56d
	C	2	2	2	2.5	2	2.5	2.5
		26	2.5	2.5	2.5	3	2.5	2.5
		18	3	3	2.5	3	2.5	2.5
		19	3	2.5	2	3	2.5	2
		24	2	2	2	3	2.5	2
		4	3	3	3	3	3	3
		14	2	2	2.5	2	2.5	2.5
		9	1	1	1	1	1	1
	T1	16	2	2.5	3	2	2.5	3
		27	2	2	2	2	2	2
		25	2	2.5	3	2	2.5	3
		22	2	2.5	3	2	2.5	2.5
		28	2	2	2	3	3	3
		10	3	3	3	3	3	3
		6	2	2.5	3	2	2.5	2.5
		12	3	3	3	3	3	3
	T2	7	3	3	3	3	3	3
		8	2	2.5	3	2	2.5	3
		23	3	3	3	3	2.5	3
		21	2.5	2.5	2.5	3	2.5	2.5
		29	2	2	2	2	2	2
		13	3	3	3	3	3	3
		15	3	3	3	3	3	3
		3	3	3	3	3	3	3
			hair scale thickness（nm）
	group	number	0d	28d	56d
	C	24	288.154	424.046	334.452
		18	403.971	271.845	346.812
		19	788.249	254.987	341.122
		26	314.638	268.292	307.963
		4	437.096	248.431	357.629
		9	377.612	261.778	301.324
	T1	28	258.298	140.485	149.006
		22	155.628	211.945	251.85
		25	404.093	109.321	211.945
		27	221.878	122.561	182.87
		10	254.987	228.691	228.476
		6	261.609	298.085	182.239
	T2	7	579.476	132.491	179.083
		8	235.121	168.906	264.921
		21	394.093	124.469	149.043
		23	380.924	165.595	202.095
		13	317.896	218.642	125.871
		15	241.811	215.256	137.207

## Sheet: Growth performance
	group	number	1d-28d ADG(g)	29d-56d ADG(g)	1d-56d ADG(g)	1d-28d ADFI(g)	29d-56d ADFI(g)	1d-56d ADFI(g)	1d-28d G/F	29d-56d G/F	1d-56d G/F
	C	2	5	2.14286	3.57143	70.25	59.0357	64.6429	0.0711744	0.0362976	0.0552486
		26	-2.5	0	-1.25	71.4286	51.9643	61.6964	-0.035	0	-0.0202605
		18	8.21429	15.3571	11.7857	84.6429	79.3214	81.9821	0.0970464	0.193606	0.14376
		19	-2.5	-2.14286	-2.32143	66.2143	52.5714	59.3929	-0.0377562	-0.0407609	-0.039086
		24	-1.78571	0	-0.892857	65.1071	59.3929	62.25	-0.0274273	0	-0.0143431
		4	17.5	-3.21429	7.14286	98.6071	88.1786	93.3929	0.177472	-0.036452	0.0764818
		14	2.5	20.3571	11.4286	72.6786	71.3929	72.0357	0.034398	0.285143	0.158651
		9	-4.28571	-0.714286	-2.5	52.9286	43.6429	48.2857	-0.0809717	-0.0163666	-0.0517751
	T1	16	-1.07143	3.57143	1.25	31.7143	37.0714	34.3929	-0.0337838	0.0963391	0.0363448
		27	3.57143	-1.78571	0.892857	38.3571	51.8571	45.1071	0.0931099	-0.0344353	0.0197941
		25	-7.85714	-4.28571	-6.07143	95.8214	89.4286	92.625	-0.0819978	-0.0479233	-0.0655485
		22	13.2143	5.35714	9.28571	73.5714	80.5714	77.0714	0.179612	0.0664894	0.120482
		28	2.5	-2.5	0	52.2143	47.3571	49.7857	0.0478796	-0.0527903	0
		10	1.42857	0.357143	0.892857	69.2857	61.7857	65.5357	0.0206186	0.00578035	0.013624
		6	5.35714	2.5	3.92857	85.2857	89.75	87.5179	0.0628141	0.0278552	0.0448888
		12	2.14286	12.8571	7.5	81.8214	98.4643	90.1429	0.0261894	0.130577	0.0832013
	T2	7	0	-1.07143	-0.535714	36.4286	40.7143	38.5714	0	-0.0263158	-0.0138889
		8	-14.2857	5.71429	-4.28571	76.25	61.5357	68.8929	-0.187354	0.0928613	-0.0622084
		23	13.9286	-2.14286	5.89286	90.4286	94.5	92.4643	0.154028	-0.0226757	0.0637312
		21	3.92857	5.35714	4.64286	81.3214	82.3571	81.8393	0.0483092	0.0650477	0.0567314
		29	13.2143	1.07143	7.14286	82.5357	63.4643	73	0.160104	0.0168824	0.0978474
		13	-3.57143	8.92857	2.67857	93.5357	96.8214	95.1786	-0.0381825	0.0922169	0.0281426
		15	4.64286	0.357143	2.5	89.25	99	94.125	0.0520208	0.0036075	0.0265604
		3	-7.14286	6.78571	-0.178571	62.1429	86.7857	74.4643	-0.114943	0.0781893	-0.00239808

## Sheet: Fecal scores
	group	number	2023-12-26	2023-12-27	2023-12-28	2023-12-29	2023-12-30	2023-12-31	2024-01-01	2024-01-02	2024-01-03	2024-01-04	2024-01-05	2024-01-06	2024-01-07	2024-01-08	2024-01-09	2024-01-10	2024-01-11	2024-01-12	2024-01-13	2024-01-14	2024-01-15	2024-01-16	2024-01-17	2024-01-18	2024-01-19	2024-01-20	2024-01-21	2024-01-22
	C	2	1	1	1	1	1	1	1	1	1	1	1	1	1	1	1	1	1	1	1	1	1	1	1	1	1	1	1	1
		26	3.5	3	3	3	3	3	3	3	2	3	2	2	2	1	1	1	1	1	1	1	1.5	1.5	1.5	1	1	1	1	1
		18	1	1	1	1	1	1	1	1	1	1.5	1	1	1	2	1	2	1	1	1	1	1	1	1	1	1.5	1.5	1	1
		19	2	1	1	1	2	2	1	2	2	1	2	2	2	1	2	2	1	2	2	1	1	1.5	1.5	1	2	2	1.5	1
		24	2	2	2	2	2	1	2	2	2	2	1	1	2	2	1	2	1	1	2	1	2	1	2	1	1	1	1	2
		4	2	2	2	2	2	2	2	2	1	2	2	1	2	2	2	1	2	1	1	2	1	2	1.5	2	1	1	1	1
		14	1	1	1	1	1	1	1	1	1	2	2	2	1	1	1	2	1	1	1.5	1	1.5	1	2	1	1	1.5	1	1.5
		9	1.5	1.5	2	2	1	2	1	2	2	1	1	3	2	1	2.5	2	1	2	1	2	2	2	2.5	2.5	3	3	2.5	2
	T1	16	0.5	0.5	0	0	0	1	0	1	0	1	1	1	1	2	1	1	1	1	1	2	1	1	1	1	1	1	1	1
		27	2	2	2	2	2	1	2	2	1	2	2	2	2	1	2	2	1	1.5	1	1	1	1	1	1	1	1	1	1.5
		25	2.5	2.5	2	2.5	2	2	1	2.5	2	2	1	1	1	2	1	1.5	1	1	1	1.5	1	1	1	1	1.5	1.5	1	1
		22	2	2	2	2	2	1	2	2	2	1	2	2	1	1	1	2	1.5	1	1	1	1	1	1	1	1	1	1	1
		28	1	1	1	1	1	1	1	1	1	1	1	1	1	2	1	1	1.5	1	2	1	1.5	1	1	1	1	1	1	1
		10	3	3	3	3	2	3	2	3	2	2	1	1	1	1	2	1.5	1	1	1	1	1.5	1.5	2	1.5	1	1	1	1
		6	2.5	2	2.5	2	2	2.5	1	2.5	2	1	2	1	1	1	1	1	2	1	1	1	1	1	1	1	1	1	1	1
		12	3	3	3	3	2	3	2	3	2	2	1	2	1	2	1	1	1	1	1	1	1	1	1	1	1	1	1	1
	T2	7	1	1	1	1	1	1	1	1	2	1	2	2	1	2	1	2	1	1	1	1	1	1.5	2	1.5	1	1	1	1
		8	1	1	1	1	1	1	1	1	2	2	2	1	2	1	1	2	2	1	1	1	1	1	1	1	1	1	1	1
		23	2	2	2	2	2	1	1	2	2	1	2	1	1	2	1	0	0	1	1	1	1	0.5	0.5	0	0	0	0	1
		21	1.5	1.5	1.5	1.5	1	2	1	1.5	1	1	1.5	1	1	1	2	1	1	2	1.5	1	1	1.5	2	2	2	1.5	1	1
		29	2	2	2	2	2	1	2	2	2	2	2	2	1	0	1.5	1	1	1.5	1	1	1.5	1	1	1	1	1	1	1
		13	2.5	2.5	2.5	2	2	2	2	2.5	2.5	2	2	1	2	1	2	1.5	1	1	1	1	1	1	1	1	1	1	1	1.5
		15	1.5	1.5	1	1	1	1	1	1.5	1	1	1	1	2	1	1	1	1	1.5	1.5	1	1	1	1	1	1	1	1	1
		3	1	1	1.5	1	1	1	1	1	1	1	1	0	1	0	1	1	1	1	1	1	1	1	1	1	1.5	2	2	1.5
	group	number	2024-01-23	2024-01-24	2024-01-25	2024-01-26	2024-01-27	2024-01-28	2024-01-29	2024-01-30	2024-01-31	2024-02-01	2024-02-02	2024-02-03	2024-02-04	2024-02-05	2024-02-06	2024-02-07	2024-02-08	2024-02-09	2024-02-10	2024-02-11	2024-02-12	2024-02-13	2024-02-14	2024-02-15	2024-02-16	2024-02-17	2024-02-18	2024-02-19
	C	2	1	1	1.5	1.5	1	1	1	1	1	1	1	1	1	1	1	1	1	1	1	1	1	1	1	1	1	1	1	1
		26	1	1	1	1	1	0.5	0.5	0	0	0	1	0.5	0.5	0.5	0.5	0.5	0.5	0.5	0.5	0	0	1	1	1	1	1	0	0
		18	1	1	1	1	1	1	1	1	1	1	1	1.5	2	2	1	1	1	1	1	1	1	1	1	1	1	1	1	1
		19	1.5	1	1	1	1	1	1	1	1	1	1	1	1	1	1	1	1	1	1	1	1	1	1	1	1	1	1	1
		24	1	2	2	2	1	1	1	1	1	1	1	1	1	1	1	1	1	1	1	1	1	1	1	1	1	1	1	1
		4	2	1.5	2	1.5	1	1	1	1	1	1	1	1	1	1	1	1	1	1	1	1	1	1	1	1	1	1	1	1
		14	1	1	1	1	1	1	1	1	1	1	1	1	1.5	1.5	1.5	2	2	2	1	1	1	2	1	1.5	2	2.5	3	3
		9	2	1	1	2	2	2	2	2	2	2	2	2	2	2	2	2	2	2.5	2.5	2	2	2	2.5	2	2	3	3	3
	T1	16	1	1	1	1	1	1	1	1	1	1	1	1	1	1	0.5	0	0	0.5	0.5	0.5	0.5	1	1	1	0.5	0.5	0.5	0.5
		27	1	1.5	1.5	2	1	1	1	1	1	1.5	1.5	1	1	1	1	1	1	1	1	1	1	1	1	1	1	1	1	1
		25	1	1	1	1	1	1	1	1	1	1	1	1	1	1	1	1	1	1	1	1	1	1	1	1	1	1	1	1
		22	1	2	1	1	1	1	1	1	1	1	1	1	1	1	1.5	1.5	1.5	1.5	1	1.5	1	1	1	1	1	1	1	1
		28	1	1	1	1	1.5	1	1	1	1	1	1	1	1	1	1	1	1	1	1	1	1	1	1	1	1	1	1	1
		10	1	1	1	1	1	1	1	1	0.5	0.5	1	1	1	1	1	1	1	1	1	1	1	1	1	1	1	1	1	1
		6	2	1	1	1	1	1	1	1	1	1	1	1	1	1	1	1	1	1	1	1	1	1	1	1	1	1	1	1
		12	2	1	1	1	1.5	1	1	1	1	1	1	1.5	1.5	1	1	1	1	1	1	1	1	1	1	1	1	1	1	1
	T2	7	1	1.5	1.5	1	1	1	1	1	1	1	0.5	0.5	0.5	1	1	1	1	1	1	1	1	1	1	1	1	1	1	1
		8	1	1	1	1	1	1	1	1	1	1	1	1	1	1	1	1	1	1	1	1	1	1	1	1	1	1	1	1
		23	1	1	1	1	1	1	1	1	1	1	1	1	1	1	1	1	1	1	1	1	1	1	1	1	1	1	1	1
		21	1.5	2	1.5	1	1	1	1	1	1.5	1	1	1.5	2	2	2.5	3	3	2.5	2.5	3	2.5	2.5	3	3	2.5	2.5	3	2.5
		29	1	1	1	1	1	1	1	1	1	1	1	1	1	1	2	2	2	2	2	2	2	2	2	2	2	2	2	2
		13	1	1	1	1	1	1	1	1	1	1	1	1	1	1	1	1	1	1	1	1	1	1	0.5	1	0.5	0.5	0.5	0.5
		15	1.5	1	1	1	1	1	1	1	1.5	1.5	1	1	1	1	1	1	2	1.5	1.5	2	2	2	2	2	2	2	2	2
		3	1	1	1.5	2	2	1	1	1	1	1	1	1	1	1	1	1	1	1	1	1	1	1	1	1	1	1	1	1

## Sheet: Other serum indexes
	TP(g/L)	ALB(g/L)	Trig(mM)	TC(mM)	ALT(U/L)
C	63.9658	38.4264	0.498394	2.13042	28.4254
	57.1185	33.9472	0.403424	2.28653	34.4335
	67.3364	43.3222	0.458761	1.85971	23.789
T1	64.0584	36.2736	0.341897	2.31164	26.6367
	63.591	40.8569	0.381972	1.72333	32.0004
	55.3247	42.7111	0.309882	1.94611	29.9947
T2	60.6802	37.6625	0.312095	1.75837	31.874
	60.6802	41.1	0.294783	1.90985	31.4091
	66.0808	42.9056	0.3571	2.08982	20.9807
